# Supplementary material for: Resolving vorticity-driven lateral fire spread using the WRF-Fire coupled atmosphere–fire numerical model
Source: Copernicus journal article supplement (doi:10.5194/nhess-14-2359-2014), 2014-09-05
Supplement: Supplementary file 1 [file nhess-14-2359-2014-supplement.zip]

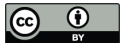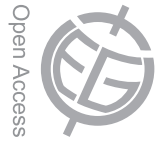

## *Supplement of*

# **Resolving vorticity-driven lateral fire spread using the WRF-Fire coupled atmosphere–fire numerical model**

**C. C. Simpson et al.**

*Correspondence to:* C. C. Simpson (c.simpson@adfa.edu.au)

- Supplement-Cover-Letter.pdf
- \_\_MACOSX
  - supplementary
    - \* .\_README
    - \* .\_input\_sounding
    - \* .\_module\_initialize\_fire.F
    - \* .\_namelist.input.dxy25fc
    - \* .\_namelist.input.dxy25fn
    - \* .\_namelist.input.dxy30fc
    - \* .\_namelist.input.dxy30fn
    - \* .\_namelist.input.dxy40fc
    - \* .\_namelist.input.dxy40fn
    - \* .\_namelist.input.dxy50fc
    - \* .\_namelist.input.dxy50fn
    - \* .\_namelist.input.dxy60fc
    - \* .\_namelist.input.dxy60fn
    - \* .\_namelist.input.dxy70fc
    - \* .\_namelist.input.dxy70fn
    - \* .\_namelist.input.dxy80fc
    - \* .\_namelist.input.dxy80fn
    - \* .\_namelist.input.dxy90fc
    - \* .\_namelist.input.dxy90fn
    - \* .\_terrain2d\_hgt.dxy30
    - \* .\_terrain2d\_hgt.dxy40
    - \* .\_terrain2d\_hgt.dxy50
    - \* .\_terrain2d\_hgt.dxy60
    - \* .\_terrain2d\_hgt.dxy70

- \* .\_terrain2d\_hgt.dxy80
- \* .\_terrain2d\_hgt.dxy90
- \* .\_terrain2d\_zsf.dxy30
- \* .\_terrain2d\_zsf.dxy40
- \* .\_terrain2d\_zsf.dxy50
- \* .\_terrain2d\_zsf.dxy60
- \* .\_terrain2d\_zsf.dxy70
- \* .\_terrain2d\_zsf.dxy80
- \* .\_terrain2d\_zsf.dxy90

- supplementary

- README
- input\_sounding
- module\_initialize\_fire.F
- namelist.input.dxy25fc
- namelist.input.dxy25fn
- namelist.input.dxy30fc
- namelist.input.dxy30fn
- namelist.input.dxy40fc
- namelist.input.dxy40fn
- namelist.input.dxy50fc
- namelist.input.dxy50fn
- namelist.input.dxy60fc
- namelist.input.dxy60fn
- namelist.input.dxy70fc
- namelist.input.dxy70fn
- namelist.input.dxy80fc
- namelist.input.dxy80fn
- namelist.input.dxy90fc
- namelist.input.dxy90fn
- terrain2d\_hgt.dxy30
- terrain2d\_hgt.dxy40
- terrain2d\_hgt.dxy50
- terrain2d\_hgt.dxy60
- terrain2d\_hgt.dxy70
- terrain2d\_hgt.dxy80
- terrain2d\_hgt.dxy90
- terrain2d\_zsf.dxy30
- terrain2d\_zsf.dxy40
- terrain2d\_zsf.dxy50
- terrain2d\_zsf.dxy60
- terrain2d\_zsf.dxy70
- terrain2d\_zsf.dxy80
- terrain2d\_zsf.dxy90
